# Supplementary material for: Establishment and Characterization of Canine Mammary Gland Carcinoma Cell Lines With Vasculogenic Mimicry Ability in vitro and in vivo
Source: Frontiers journal article supplement (doi:10.3389/fvets.2020.583874), 2020-10-27
Supplement: Data_Sheet_1.PDF [file Data_Sheet_1.PDF]

Supplementary Table A1. Primary antibodies used in immunochemistry to characterize the molecular phenotype from mammary gland tumors.

| Antibody | Manufacture                                                         | Clone   | Dilution   | Imunolocalization |
|----------|---------------------------------------------------------------------|---------|------------|-------------------|
| P63      | Dako, Agilent Technologies, Santa Clara, CA, USA                    | 4A4     | 1:100      | Nuclei            |
| HER2     | Roche Diagnostics, Risch-Rotkreuz, Switzerland                      | 4B5     | 1:400      | Membrane          |
| ERα      | Santa Cruz Biotechnology®, Santa Cruz, CA, USA                      | C311    | 1:50       | Nuclei            |
| PR       | Roche Diagnostics, Risch-Rotkreuz, Switzerland                      | 1E2     | Prediluted | Nuclei            |
| Ki-67    | Dako, Agilent Technologies, Santa Clara, CA, USA                    | MIB1    | 1:50       | Nuclei            |
| CK5/6    | Dako, Agilent Technologies, Santa Clara, CA, USA                    | D5/16B4 | 1:10       | Citoplasm         |
| EGFR     | Invitrogen, Thermo Fisher Scientific Corporation, Carlsbad, CA, USA | 31G7    | 1:20       | Citoplasm         |

Supplementary Table A2. Primary antibodies used in cell immunofluorescence to characterize the cell clone (cell origin) that was expanded in each culture.

| Antibody         | Manufacture                                                         | Clone   | Dilution | Imunolocalization |
|------------------|---------------------------------------------------------------------|---------|----------|-------------------|
| Pan-citoqueratin | Invitrogen, Thermo Fisher Scientific Corporation, Carlsbad, CA, USA | AE1/AE3 | 1:300    | Citoplasm         |
| Vimentin         | Invitrogen, Thermo Fisher Scientific Corporation, Carlsbad, CA, USA | V9      | 1:300    | Citoplasm         |
| CK8/18           | Novocastra, Vision BioSystems Ltd, Newcastle, UK, Europe            | 5D3     | 1:600    | Citoplasm         |

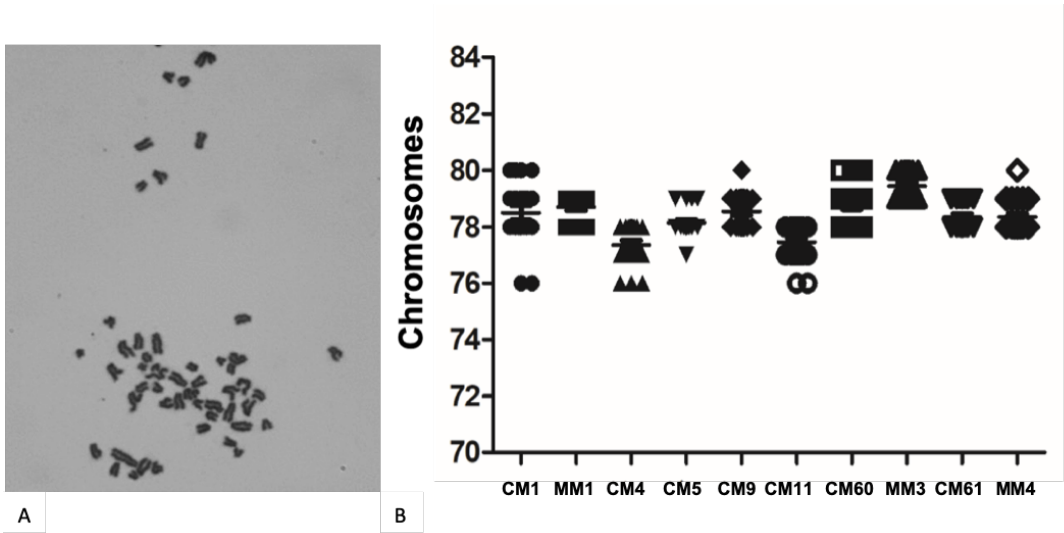

Supplementary Figure A1. Chromosomal preparation from cell culture of female dog mammary gland carcinoma (A). Graphic representation of chromosomal alterations in different cultures of canine mammary gland cancer and its metastases (B).

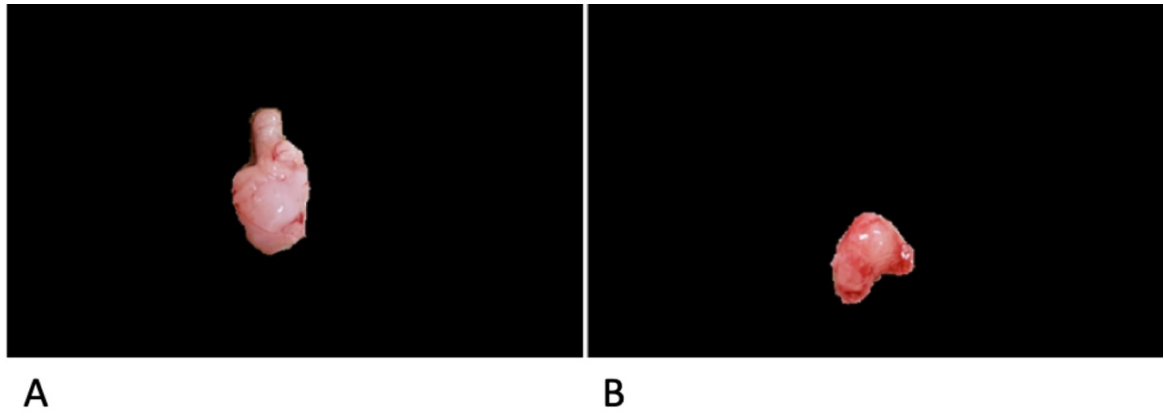

Supplementary Figure A2. Macroscopic appearance of tumours after 60 days of growth. A: Tumour growth from UNESP-MM4 cell line. B: Tumour growth from UNESP-CM60 cell line.
